# Supplementary material for: Ultrathin nanoporous Fe3O4–carbon nanosheets with enhanced supercapacitor performance
Source: Royal Society of Chemistry journal article supplement (doi:10.1039/c2ta01035f), 2012-12-11
Supplement: c2ta01035f.pdf [file c2ta01035f.pdf]

Electronic supplementary information for

## **Ultrathin Nanoporous Fe<sub>3</sub>O<sub>4</sub>-Carbon Nanosheets with Enhanced Supercapacitor Performance**

Dequan Liu,<sup>a,b</sup> Xi Wang,<sup>a,\*</sup> Xuebin Wang,<sup>a</sup> Wei Tian,<sup>a</sup> Jiangwei Liu,<sup>a</sup> Chunyi Zhi,<sup>c</sup> Deyan He,<sup>b</sup>

Yoshio Bando,<sup>a</sup> and *Dmitri Golberg*<sup>a,\*</sup>

<sup>a</sup>International Center for Materials Nanoarchitectonics (MANA), National Institute for Materials Science (NIMS), Namiki 1-1, Tsukuba, Ibaraki, 305-0044, Japan. E-mail: WANG.Xi2@nims.go.jp, GOLBERG.Dmitri@nims.go.jp

<sup>b</sup>School of Physical Science and Technology, Key Laboratory for Magnetism and Magnetic Materials of the Ministry of Education, Lanzhou University, Lanzhou, 730000, China

<sup>c</sup>Department of Physics and Materials Science, City University of Hong Kong Tat Chee Avenue, Kowloon, Hong Kong, China.

## Experimental

*Synthesis of ultrathin nanoporous Fe<sub>3</sub>O<sub>4</sub> nanosheets (SNSs):* In a typical procedure, FeCl<sub>3</sub>·6H<sub>2</sub>O (1 g) and NH<sub>4</sub>HCO<sub>3</sub> (4 g) were added into ethylene glycol (60 ml). After stirring for half an hour in a beaker, the mixture was then transferred into a Teflon-lined autoclave (with a filling volume ratio of 60%), which was sealed and maintained at 185 °C for 10-48 h, and then naturally cooled to room temperature. The resulting products were collected and washed with distilled water and absolute ethanol to remove ions and possible remnants, and dried under vacuum at 60 °C for 6 h. Finally, the as-made products were under heat treatment at 250-400 °C.

*Characterizations:* Transmission electron microscopy (TEM) images were taken with a JEOL F3000 microscope operated at 300 kV. Samples were first dispersed in ethanol and then collected using carbon-film-covered copper grids for analysis. Scanning electron microscopy (SEM) images were recorded on a S4800 electron microscope operating at 15 kV. XRD patterns were recorded on a Philips X Pert PRO MPD X-ray diffractometer operated at 35 kV and 45 mA with Cu K $\alpha$  radiation. XPS measurements were carried out with an ESCALab220i-XL spectrometer by using a twin-anode Al K $\alpha$  (1486.6 eV) X-ray source. All spectra were calibrated to the binding energy of the C 1s peak at 284.6 eV. The base pressure was  $\sim 3 \times 10^{-7}$  Pa. Raman spectra were taken on a Horiba Jobin-Yoon T6400 Raman spectrometer.

*Electrochemical Test:* Electrochemical performance of the hybrid composite electrode was studied using a Solartron electrochemical workstation. The standard three-electrode cell was composed of Ag/AgCl as a reference electrode, Pt mesh as a counter electrode and the synthesized composite sample as a working electrode, respectively. A 1 M Na<sub>2</sub>SO<sub>3</sub> solution served as electrolyte at room temperature. Cyclic voltammetry (CV) was analyzed at various scan rates of 5, 20, 50, and 100 mV/s. Galvanostatic (GV) charge/discharge curves were obtained at various current densities of 1-10 A/g to evaluate the specific capacitance.

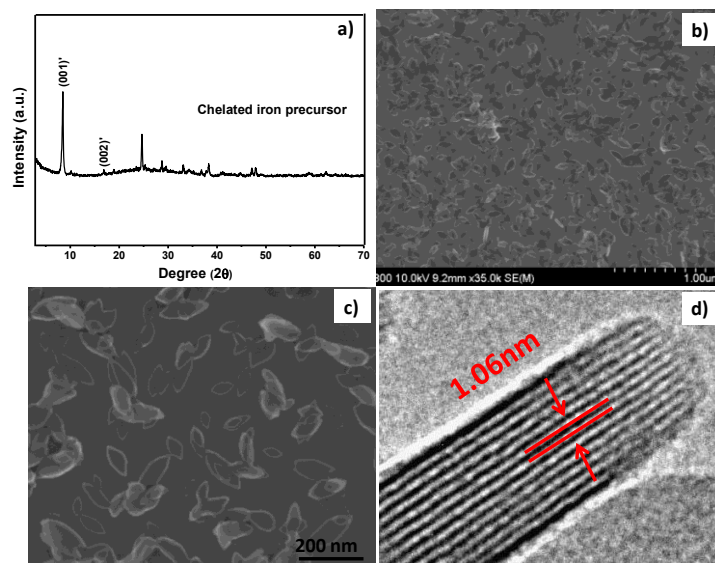

**Fig. S1.** a) XRD patterns of obtained chelated iron precursors. b-c) Low- and high-magnification SEM images of the obtained chelated iron precursors. d) TEM image of the obtained chelated iron precursors. The inset shows their corresponding HRTEM images, Scale bar: 10 nm.

The layered structure of the obtained chelated iron precursors can be well proofed by XRD, SEM and TEM characterizations. As shown in Fig. S1, one strong peak and another weak peak with corresponding  $d$  spacings of 10.6 and 5.3 3.5 Å can be indexed to the  $00l$  reflection series of a with an interlayer spacing of *ca.* 10.6 Å. In addition, other peaks in a region of  $2\theta$  from 10 to 70° are indexed to the iron glycolate phase (Fig. S1a), similar to other metal glycolate compounds.<sup>1</sup> The as-synthesized chelated iron precursors can be produced in large scale as observed in SEM image (Fig. S1b). And the oval shapes of these nanosheets can be clearly seen in Fig. 1c. Their well-defined multilayered structures along the thickness direction can be clearly observed from the high-resolution transmission electron microscopy (HRTEM) images (Fig. S1d), indicating that the nanostructures are formed by stacking of several ultrathin nanosheets. And the interlayer spacing of the nanosheets is estimated to be ~1.06 nm, fitting well its XRD data (Fig. S1a).

1. a) X. Wang, X. -L. Wu, Y. T. Zhong, Y. -G. Guo, Y. Ma, J. N. Yao, *Adv. Funt. Mater.* **2010**, *20*, 1680. b) Y. Wang, X. Jiang, Y. Xia, *J. Am. Chem. Soc.* **2003**, *125*, 16176.

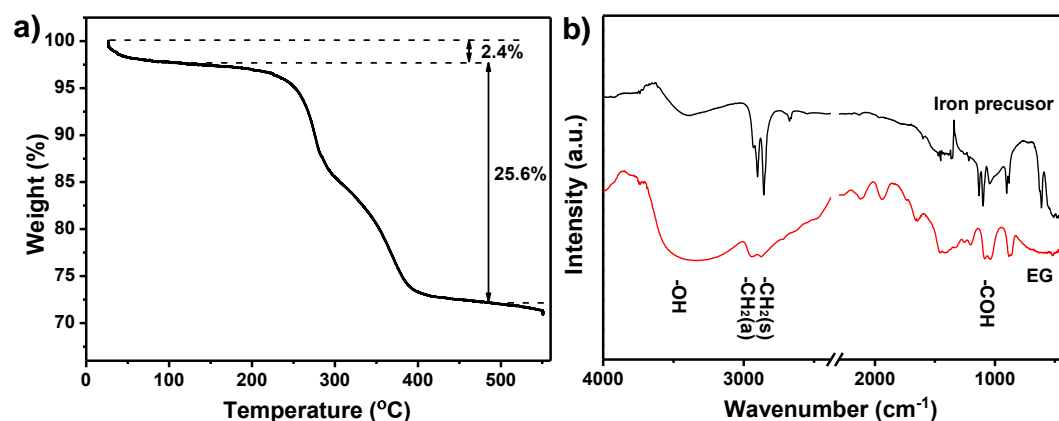

**Fig. S2.** a) TG curve of the chelated iron precursors. b) FT-IR spectrum of EG (red line), and the chelated iron precursors (black line).

The components of the precursors can also be noticed under both thermogravimetric (TG) analysis (Fig. S2a) and Fourier transform infrared (FT-IR) spectroscopy (Fig. S2b). The TGA curve shows a total weight loss of ~25.4% from 100°C to 500°C, which is attributed to the decomposition of organic components within the composite structure.<sup>1</sup> As shown in FT-IR spectra in Fig. S2b, compared with pure EG, the vibrational bands of CH<sub>2</sub>- and C-O of the iron precursors become stronger and sharper. The lower peak frequencies of the methylene C-H stretching mode are due to ordered alkyl chains of intercalated ethylene glycol molecules.<sup>2</sup>

1. a) X. Wang, X. -L. Wu, Y. T. Zhong, Y. -G. Guo, Y. Ma, J. N. Yao, *Adv. Funct. Mater.* **2010**, *20*, 1680. b) Y. Wang, X. Jiang, Y. Xia, *J. Am. Chem. Soc.* **2003**, *125*,

16176.

2. A. N. Parikht, D. L. Auara, I. B. Azouz, F. Rondelez, *J. Phys. Chem.* **1994**, *98*, 7577.

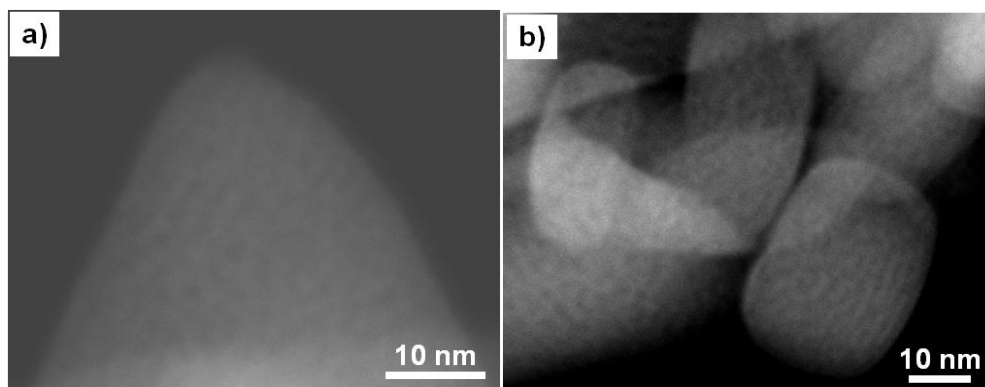

**Fig. S3.** HAADF-STEM images of SNSs after 5000 cycles viewed from the top (a) and from the side (b).

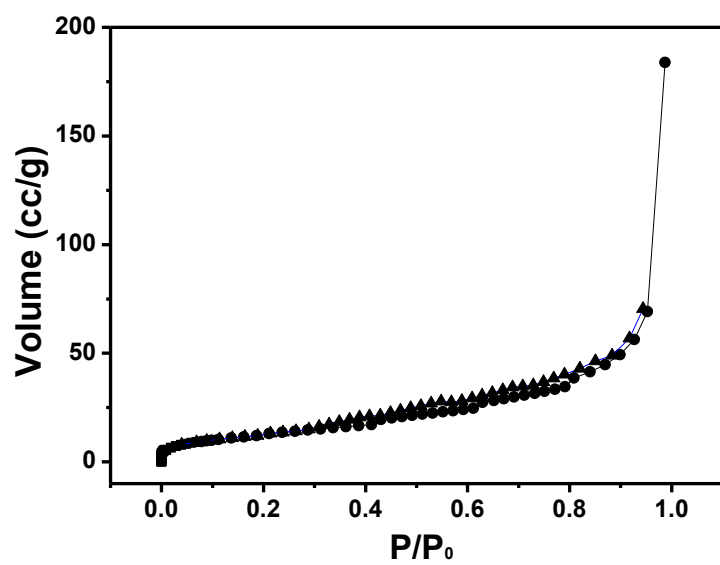

**Fig. S4.** The nitrogen sorption isotherms at 77 K for Fe<sub>3</sub>O<sub>4</sub> nanoparticles.



**Table S1.** Comparison of the electrochemical performance of SNSs fabricated in this work with previous works.

| Samples                                                       | Electrolyte                     | Current density (mA/g) | Potential range (V) | Capacitance (F/g)      | Capacitance retention (%)  | Rate capacity                                        | Ref.      |
|---------------------------------------------------------------|---------------------------------|------------------------|---------------------|------------------------|----------------------------|------------------------------------------------------|-----------|
| Fe <sub>3</sub> O <sub>4</sub> nanocrystals@graphene          | KCl                             | -                      | 0-0.5               | 88                     | >90% after 1000 cycles     | -                                                    | 1a        |
| Fe <sub>3</sub> O <sub>4</sub> nanosheets                     | Na <sub>2</sub> SO <sub>3</sub> | 420                    | (-0.9)-(-0.1)       | 83                     | 36% after 1000 cycles      | -                                                    | 1b        |
| Fe <sub>3</sub> O <sub>4</sub> nanosheets-carbon nanofibers   | Na <sub>2</sub> SO <sub>3</sub> | 420                    | (-0.9)-(-0.1)       | 135                    | 91% after 1000 cycles      | -                                                    | 1b        |
| Fe <sub>3</sub> O <sub>4</sub> @SnO <sub>2</sub> nanorod film | Na <sub>2</sub> SO <sub>3</sub> | 0.2 mAcm <sup>-2</sup> | (-0.8)-(-0.2)       | 7.013 cm <sup>-2</sup> | mF 82.8% after 2000 cycles | 2.26 mF cm <sup>-2</sup> at 1.66 mA cm <sup>-2</sup> | 1c        |
| Fe <sub>3</sub> O <sub>4</sub> nanorod film                   | Na <sub>2</sub> SO <sub>3</sub> | 0.2 mAcm <sup>-2</sup> | (-0.8)-(-0.2)       | 5.156 cm <sup>-2</sup> | mF > 70% after 2000 cycles | 2.26 mF cm <sup>-2</sup> at 1.66 mA cm <sup>-2</sup> | 1c        |
| Fe <sub>3</sub> O <sub>4</sub> nanoparticle /activated carbon | KOH                             | 0.5 mAcm <sup>-2</sup> | 0-1.2               | 37.9                   | 82% after 500 cycles       | 36 F/g at 2 mAcm <sup>-2</sup>                       | 1h        |
| Octadecahedron Fe <sub>3</sub> O <sub>4</sub> thin film       | Na <sub>2</sub> SO <sub>3</sub> | 6                      | (-1)-0.1            | 118.2                  | 88.75% after 500 cycles    | -                                                    | 1f        |
| SNSs                                                          | Na <sub>2</sub> SO <sub>3</sub> | 1000                   | (-0.8)-(-0.2)       | 163.4                  | 93% after 5000 cycles      | 112 mAh/g at 10 A/g                                  | This work |

1. a) B. Li, H. Cao, J. Shao, M. Qu, J. H. Warner, *J. Mater. Chem.* **2011**, *21*, 5069. b) J. B. Mu, B. Chen, Z. C. Guo, M. Y. Zhang, Z. Y. Zhang, P. Zhang, C. L. Shao and Y. C. Liu, *Nanoscale*, **2011**, *3*, 5034. c) R. Li, X. Ren, F. Zhang, C. Du, J. Liu, *Chem. Commun.* **2012**, *48*, 5010. d) K. Y. Xie, J. Li, Y. Q. Lai, W. Lu, Z. A. Zhang, Y. X. Liu, L. M. Zhou, H. T. Huang, *Electrochem. Commun.* **2011**, *13*, 657. e) M. S. Wu, R. H. Lee, *J. Electrochem. Soc.* **2009**, *156*, A737. f) J. Chen, K. L. Huang, S. Q. Liu, *Electrochim. Acta* **2009**, *55*, 1. g) K. W. Chung, K. B. Kim, S. H. Han, H. Lee, *Electrochem. Solid-State Lett.* **2005**, *8*, A259. h) X. Du, C. Y. Wang, M. M. Chen, Y. Jiao, J. Wang, *J. Phys.Chem. C* **2009**, *113*, 2643.
